# Supplementary material for: Computational analysis of binding free energies, hotspots and the binding mechanism of Bcl-xL/Bcl-2 binding to Bad/Bax
Source: Royal Society of Chemistry journal article supplement (doi:10.1039/d0cp04693k), 2021-01-01
Supplement: d0cp04693k1.pdf [file d0cp04693k1.pdf]

## Supporting Information

### Computational Analysis of Binding Free Energies, Hotspots and Binding Mechanism in Bcl-2/Bcl-xL Binding to Bad/Bax

Lili Duan,\*<sup>1</sup> Shuheng Dong,<sup>1</sup> Kaifang Huang,<sup>1</sup> Yalong Cong,<sup>2</sup> Song Luo,<sup>1</sup> John Z. H. Zhang,<sup>\*2,3,4,5</sup>

<sup>1</sup>School of Physics and Electronics, Shandong Normal University, Jinan 250014, China

<sup>2</sup>Shanghai Engineering Research Center of Molecular Therapeutics and New Drug Development, School of Chemistry and Molecular Engineering, East China Normal University, Shanghai, 200062, China

<sup>3</sup>NYU-ECNU Center for Computational Chemistry at NYU Shanghai, Shanghai 200062, China

<sup>4</sup>Department of Chemistry, New York University, NY, NY 10003, USA

<sup>5</sup>Collaborative Innovation Center of Extreme Optics, Shanxi University, Taiyuan, Shanxi 030006, China

Corresponding author ([duanll@sdu.edu.cn](mailto:duanll@sdu.edu.cn); [john.zhang@nyu.edu](mailto:john.zhang@nyu.edu))

### Tables

**Table S1.** Components of the binding free energy and corresponding standard error of the mean calculated by various methods. (in unit of kcal/mol)

| System            | PBSA              |                   |                  |                  | -TΔS     |          | AS-IE             |                   |                  |                  |           | ΔG <sub>exp</sub> |
|-------------------|-------------------|-------------------|------------------|------------------|----------|----------|-------------------|-------------------|------------------|------------------|-----------|-------------------|
|                   | ΔE <sub>ele</sub> | ΔE <sub>vdw</sub> | ΔG <sub>pb</sub> | ΔG <sub>np</sub> | Nmode    | IE       | ΔE <sub>ele</sub> | ΔE <sub>vdw</sub> | ΔG <sub>pb</sub> | ΔG <sub>np</sub> | IE        |                   |
| <b>Bcl-xL/Bad</b> | -363.4±3.2        | -132.6±0.5        | 399.1±2.9        | -16.0±0.0        | 55.4±2.5 | 82.9±0.0 | 26.7±0.4          | 53.5±0.5          | -29.3±0.4        | 2.6±0.0          | -35.3±0.0 | -12.6             |
| <b>Bcl-xL/Bax</b> | -228.5±2.6        | -111.3±0.5        | 256.4±2.3        | -13.0±0.0        | 49.3±1.1 | 71.9±0.0 | 38.1±0.4          | 47.4±0.4          | -37.2±0.5        | 1.7±0.0          | -40.4±0.0 | -9.2              |
| <b>Bcl-2/Bad</b>  | -295.2±1.9        | -104.6±0.4        | 333.7±1.6        | -14.1±0.0        | 47.9±1.1 | 50.1±0.0 | 25.1±0.3          | 48.4±0.4          | -31.7±0.3        | 3.3±0.0          | -30.4±0.0 | -10.2~-12.6       |
| <b>Bcl-2/Bax</b>  | -252.7±3.3        | -132.4±0.6        | 276.2±2.9        | -14.6±0.0        | 56.8±0.7 | 96.6±0.0 | 34.6±0.4          | 59.2±0.5          | -31.1±0.3        | 1.8±0.0          | -52.5±0.0 | -10.2             |

**Table S2.** Residue-specific binding free energies within 5 Å around the binding interface between Bcl-xL and Bad/Bax from AS-IE calculations. (in unit of kcal/mol)

| <i>Residues</i> | $\Delta E_{ele}$ |               | $\Delta E_{vdW}$ |               | $\Delta G_{pb}$ |               | $\Delta G_{np}$ |               | $-T\Delta S$  |               | $\Delta\Delta G_{bind}^{x \rightarrow a}$ |               |
|-----------------|------------------|---------------|------------------|---------------|-----------------|---------------|-----------------|---------------|---------------|---------------|-------------------------------------------|---------------|
|                 | <i>Bcl-xL</i>    | <i>Bcl-xL</i> | <i>Bcl-xL</i>    | <i>Bcl-xL</i> | <i>Bcl-xL</i>   | <i>Bcl-xL</i> | <i>Bcl-xL</i>   | <i>Bcl-xL</i> | <i>Bcl-xL</i> | <i>Bcl-xL</i> | <i>Bcl-xL</i>                             | <i>Bcl-xL</i> |
|                 | <i>Bad</i>       | <i>Bax</i>    | <i>Bad</i>       | <i>Bax</i>    | <i>Bad</i>      | <i>Bax</i>    | <i>Bad</i>      | <i>Bax</i>    | <i>Bad</i>    | <i>Bax</i>    | <i>Bad</i>                                | <i>Bax</i>    |
| <i>Phe101</i>   | -0.51            | 0.12          | 6.09             | 4.09          | -2.37           | -2.71         | 0.02            | -0.06         | -1.03         | -2.22         | 2.20                                      | -0.79         |
| <i>Arg104</i>   | 10.90            | 5.36          | 2.77             | 3.29          | -6.86           | -4.79         | 0.09            | 0.52          | -4.33         | -3.21         | 2.56                                      | 1.18          |
| <i>Tyr105</i>   | 5.59             | -0.58         | 5.63             | 5.62          | -5.35           | -0.82         | 0.40            | 0.46          | -4.38         | -1.43         | 1.89                                      | 3.25          |
| <i>Phe109</i>   | 0.48             | 0.35          | 1.86             | 1.07          | -0.57           | -1.42         | -0.07           | -0.01         | -0.16         | -0.05         | 1.55                                      | -0.06         |
| <i>Leu112</i>   | 0.15             | 0.61          | 2.31             | 1.71          | -0.99           | -1.26         | 0.05            | 0.08          | -0.52         | -0.69         | 1.01                                      | 0.44          |
| <i>Gln115</i>   | 1.38             | 5.92          | 1.03             | 3.50          | -1.55           | -6.03         | 0.11            | 0.27          | -1.24         | -1.13         | -0.28                                     | 2.52          |
| <i>Leu116</i>   | 0.03             | 0.58          | 3.92             | 2.34          | 0.26            | 0.45          | 0.00            | -0.12         | -1.15         | -1.79         | 3.07                                      | 1.45          |
| <i>Gln125</i>   | -0.86            | 0.17          | 0.65             | 0.28          | 0.70            | -0.29         | 0.01            | 0.02          | -0.56         | -2.00         | -0.06                                     | -1.82         |
| <i>Gln129</i>   | 1.89             | 7.77          | 2.80             | 0.83          | -2.99           | -6.77         | 0.27            | 0.15          | -1.10         | -6.13         | 0.87                                      | -4.15         |
| <i>Val130</i>   | 0.39             | 0.18          | 1.44             | 3.85          | -0.40           | 1.06          | 0.00            | -0.05         | -0.67         | -0.55         | 0.76                                      | 4.49          |
| <i>Leu134</i>   | 0.90             | 1.17          | 4.05             | 3.43          | -1.49           | -2.06         | -0.06           | -0.09         | -0.56         | -1.34         | 2.83                                      | 1.11          |
| <i>Arg136</i>   | -10.86           | -4.54         | 3.13             | 0.23          | 8.67            | 3.89          | 0.32            | 0.00          | -0.84         | -1.44         | 0.42                                      | -1.86         |
| <i>Asp137</i>   | 6.91             | 5.55          | 0.51             | -0.75         | -5.90           | -3.21         | 0.04            | 0.04          | 0.39          | -4.34         | 1.95                                      | -2.71         |
| <i>Asn140</i>   | 2.83             | 3.19          | 1.04             | 1.39          | -3.05           | -1.05         | 0.24            | 0.02          | -2.48         | -2.53         | -1.42                                     | 1.02          |
| <i>Arg143</i>   | 4.75             | 6.29          | 1.89             | 3.29          | -2.19           | -3.30         | 0.40            | 0.16          | -5.88         | -5.40         | -1.03                                     | 1.06          |
| <i>Leu198</i>   | 0.19             | 0.55          | 0.83             | 3.31          | -1.43           | -1.49         | 0.13            | 0.23          | -0.16         | -0.65         | -0.44                                     | 1.94          |
| <i>Tyr199</i>   | -0.11            | -0.62         | 5.61             | 4.00          | -1.13           | -0.62         | 0.31            | -0.01         | -1.10         | -1.76         | 3.59                                      | 0.99          |

**Table S3.** Residue-specific binding free energies within 5 Å around the binding interface between Bcl-2 and Bad/Bax from AS-IE calculations. (in unit of kcal/mol)

| <i>Residues</i> | $\Delta E_{ele}$ |              | $\Delta E_{vdW}$ |              | $\Delta G_{pb}$ |              | $\Delta G_{np}$ |              | $-T\Delta S$ |              | $\Delta\Delta G_{bind}^{x\rightarrow a}$ |              |
|-----------------|------------------|--------------|------------------|--------------|-----------------|--------------|-----------------|--------------|--------------|--------------|------------------------------------------|--------------|
|                 | <i>Bcl-2</i>     | <i>Bcl-2</i> | <i>Bcl-2</i>     | <i>Bcl-2</i> | <i>Bcl-2</i>    | <i>Bcl-2</i> | <i>Bcl-2</i>    | <i>Bcl-2</i> | <i>Bcl-2</i> | <i>Bcl-2</i> | <i>Bcl-2</i>                             | <i>Bcl-2</i> |
|                 | <i>/</i>         | <i>/</i>     | <i>/</i>         | <i>/</i>     | <i>/</i>        | <i>/</i>     | <i>/</i>        | <i>/</i>     | <i>/</i>     | <i>/</i>     | <i>/</i>                                 | <i>/</i>     |
|                 | <i>Bad</i>       | <i>Bax</i>   | <i>Bad</i>       | <i>Bax</i>   | <i>Bad</i>      | <i>Bax</i>   | <i>Bad</i>      | <i>Bax</i>   | <i>Bad</i>   | <i>Bax</i>   | <i>Bad</i>                               | <i>Bax</i>   |
| <i>Phe104</i>   | 0.41             | 0.20         | 3.71             | 5.01         | -2.66           | -1.72        | 0.13            | -0.11        | -0.63        | -0.88        | 0.96                                     | 2.50         |
| <i>Arg107</i>   | 3.12             | 8.78         | 3.04             | 5.55         | -2.33           | -6.64        | 0.39            | 0.42         | -2.25        | -3.91        | 1.96                                     | 4.20         |
| <i>Tyr108</i>   | 1.46             | -0.42        | 2.80             | 5.38         | -1.47           | -0.11        | -0.03           | -0.04        | -1.77        | -1.66        | 1.00                                     | 3.14         |
| <i>Arg110</i>   | 4.89             | 7.98         | -0.29            | -2.08        | -3.43           | -4.88        | 0.41            | 0.04         | -3.28        | -7.59        | -1.70                                    | -6.52        |
| <i>Phe112</i>   | 0.65             | 0.12         | 4.55             | 5.78         | -3.47           | -3.04        | 0.60            | 0.44         | -1.32        | -2.18        | 1.01                                     | 1.12         |
| <i>Met115</i>   | 0.04             | 0.64         | 1.28             | 1.75         | -1.40           | -0.98        | -0.04           | -0.08        | -0.83        | -0.53        | -0.95                                    | 0.80         |
| <i>Gln118</i>   | 1.25             | -2.38        | 4.57             | 5.36         | -2.39           | 0.36         | 0.50            | 0.17         | -2.36        | -1.14        | 1.57                                     | 2.37         |
| <i>Leu119</i>   | 0.41             | 0.38         | 1.11             | 0.75         | -1.99           | -0.22        | 0.09            | -0.06        | -0.02        | -0.60        | -0.40                                    | 0.25         |
| <i>Thr132</i>   | 0.62             | -            | 2.12             | -            | -1.03           | -            | 0.10            | -            | -0.33        | -            | 1.48                                     | -            |
| <i>Val133</i>   | 0.11             | -0.26        | 1.95             | 2.31         | 0.22            | 0.53         | 0.00            | 0.05         | -1.89        | -1.26        | 0.38                                     | 1.36         |
| <i>Glu136</i>   | 15.67            | 11.99        | 2.03             | -1.30        | -12.19          | -9.07        | 0.10            | 0.27         | -4.84        | -7.10        | 0.78                                     | -5.22        |
| <i>Leu137</i>   | 0.45             | 0.52         | 4.04             | 3.31         | -0.97           | -0.92        | -0.02           | -0.10        | -0.80        | -1.19        | 2.70                                     | 1.62         |
| <i>Arg139</i>   | -10.06           | 0.57         | 0.86             | 1.54         | 8.69            | 0.45         | 0.03            | 0.37         | -0.30        | -6.24        | -0.79                                    | -3.32        |
| <i>Asp140</i>   | 9.79             | 2.44         | -1.18            | -0.71        | -7.24           | -0.59        | 0.07            | 0.02         | -4.59        | -4.79        | -3.15                                    | -3.63        |
| <i>Asn143</i>   | 4.53             | 4.79         | 1.97             | 1.56         | -2.56           | -2.71        | 0.10            | 0.05         | -0.75        | -2.78        | 3.29                                     | 0.92         |
| <i>Arg146</i>   | -3.46            | 5.47         | 3.67             | 6.28         | 3.33            | -3.50        | 0.13            | 0.10         | -1.17        | -3.58        | 2.51                                     | 4.77         |
| <i>Leu201</i>   | 0.01             | 1.19         | 1.57             | 4.20         | -0.96           | -2.45        | 0.26            | 0.21         | -0.54        | -0.74        | 0.34                                     | 2.41         |
| <i>Tyr202</i>   | 0.46             | 0.29         | 1.59             | 2.69         | -0.72           | -1.18        | 0.10            | 0.02         | -0.34        | -0.52        | 1.08                                     | 1.30         |
| <i>Pro204</i>   | 0.09             | 0.54         | 0.14             | 2.72         | -0.10           | 0.61         | 0.00            | 0.04         | -0.01        | -1.06        | 0.12                                     | 2.84         |

## Figures

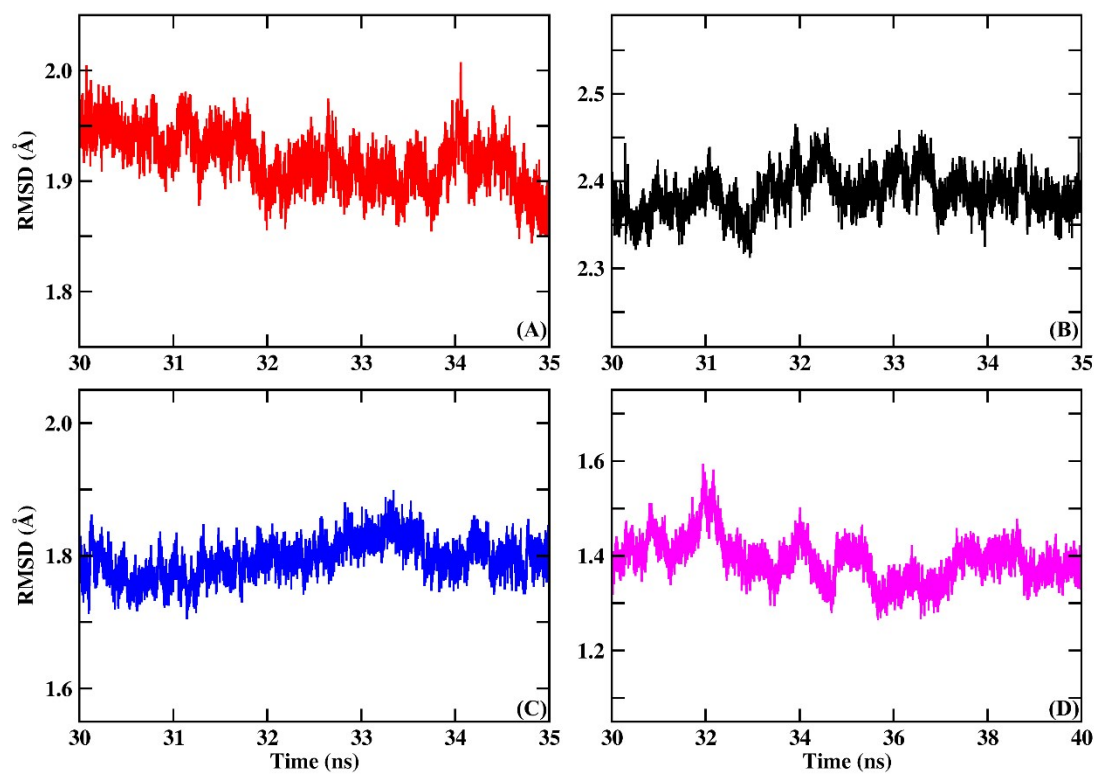

**Figure S1.** The root-mean-square deviation (RMSD) of all atoms relative to the corresponding native structure for Bcl-xL/Bad (A), Bcl-xL/Bax (B), Bcl-2/Bad (C), and Bcl-2/Bax (D), respectively.

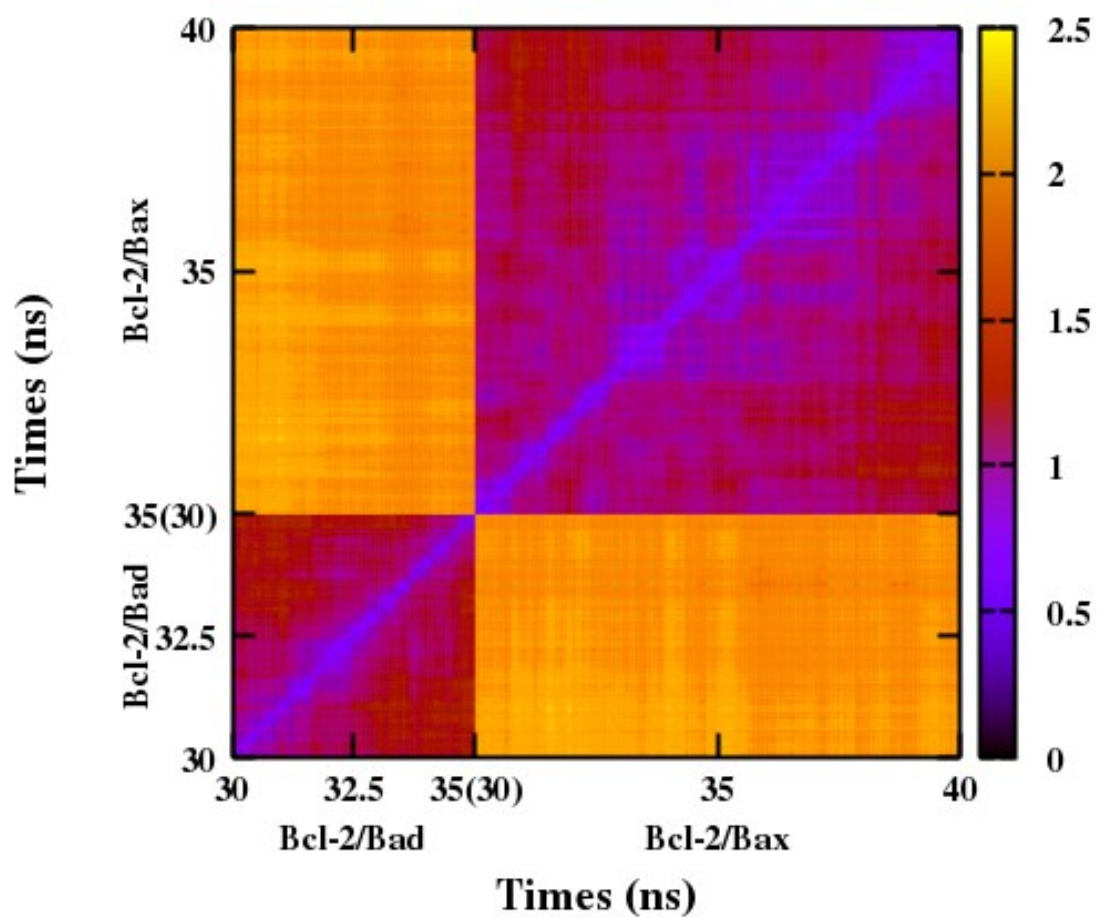

**Figure S2.** Cross-comparison of 2D-RMSD of Bcl-2 protein from Bcl-2/Bad and Bcl-2/Bax systems in all trajectories with units of Å.

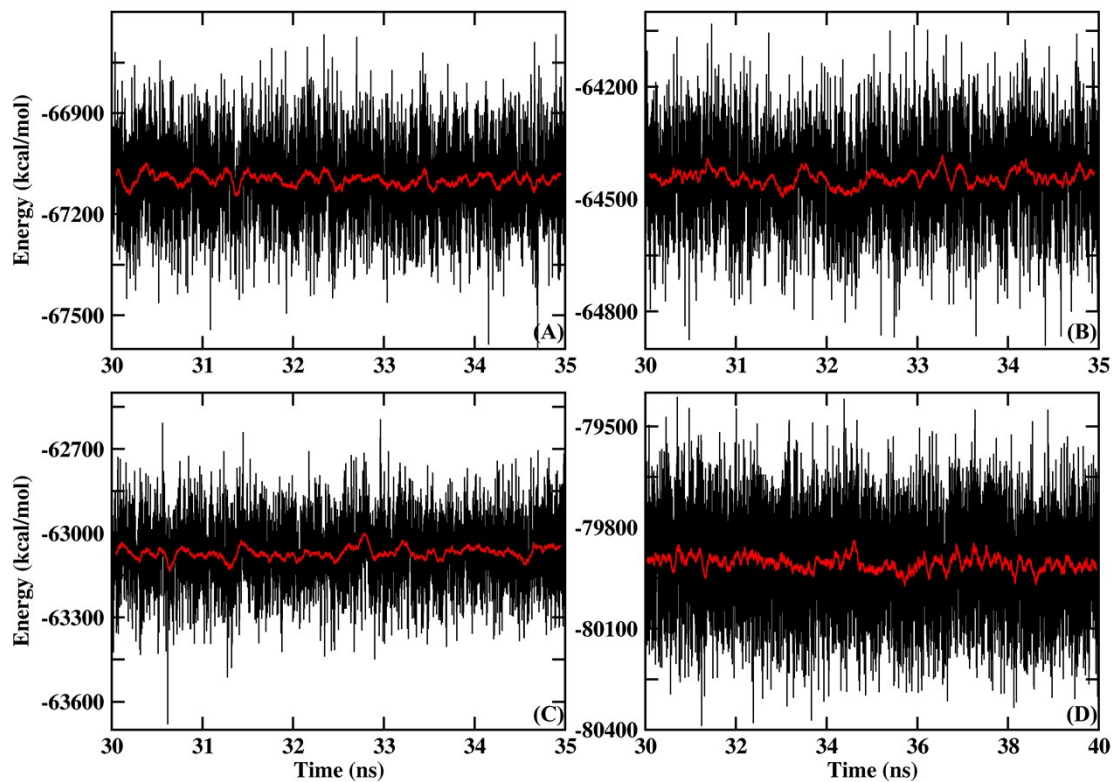

**Figure S3.** The potential energies of Bcl-xL/Bad (A), Bcl-xL/Bax (B), Bcl-2/Bad (C), and Bcl-2/Bax (D) systems as a function of time observed during MD simulation. The red solid line represents a 100 ps running average.

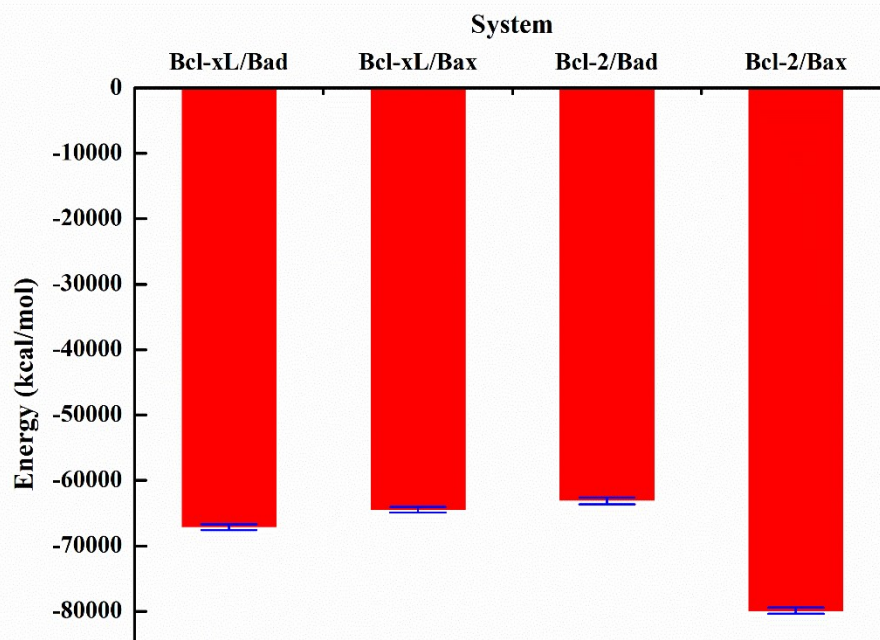

**Figure S4.** The red histograms denote the average value of potential energies of Bcl-xL/Bad, Bcl-xL/Bax, Bcl-2/Bad, and Bcl-2/Bax systems, with blue lines denote error bar.
